# Supplementary material for: Disclosing the Antifungal Mechanisms of the Cyclam Salt H4[H2(4-CF3PhCH2)2Cyclam]Cl4 against Candida albicans and Candida krusei
Source: MDPI journal article supplement (doi:10.3390/ijms25105209), 2024-05-10
Supplement: s1 [file s1]

## Supplementary Material

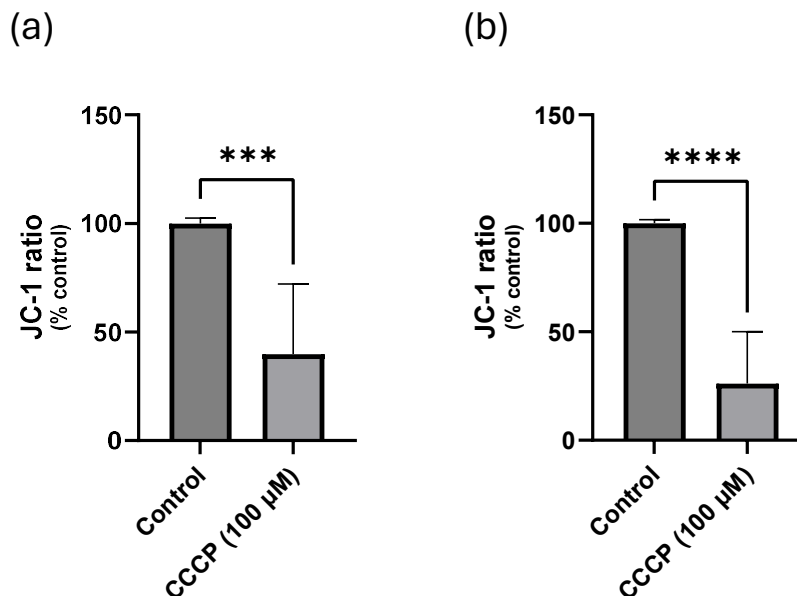

**Figure S1.** Effects of CCCP (100 μM, positive control) on the mitochondrial membrane potential ( $\Delta\Psi_m$ ) of (a) *Candida krusei* ATCC 6258 and (b) *Candida albicans* ATCC 10231, evaluated using the JC-1 dye. Results are presented as Mean + SD from 4 independent experiments, performed in duplicate. \*\*\*  $p < 0.001$ ; \*\*\*\*  $p < 0.0001$ .

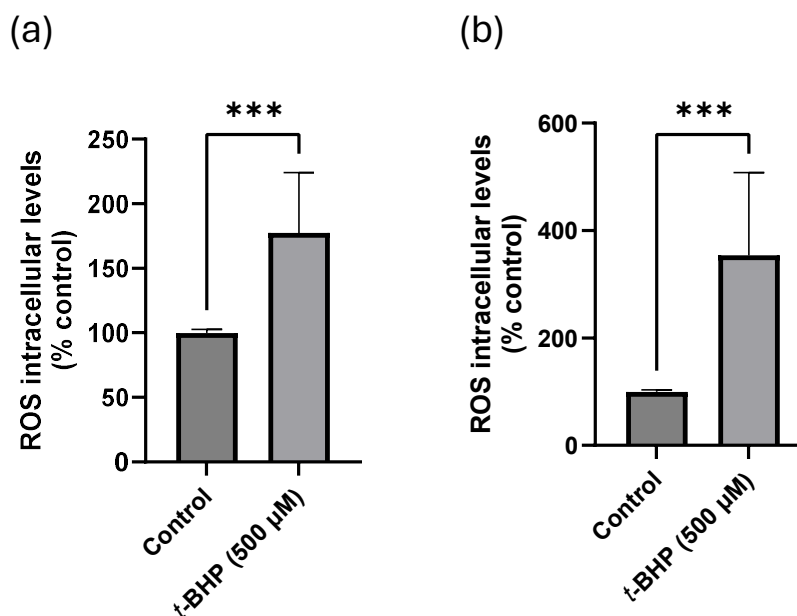

**Figure S2.** Effects of t-BHP (500 μM, positive control) on reactive oxygen species (ROS) production in *Candida krusei* ATCC 6258 after (a) 2 and (b) 6 hours of treatment. Results are presented as Mean + SD from 4 independent experiments, performed in duplicate. \*\*\*  $p < 0.001$ .

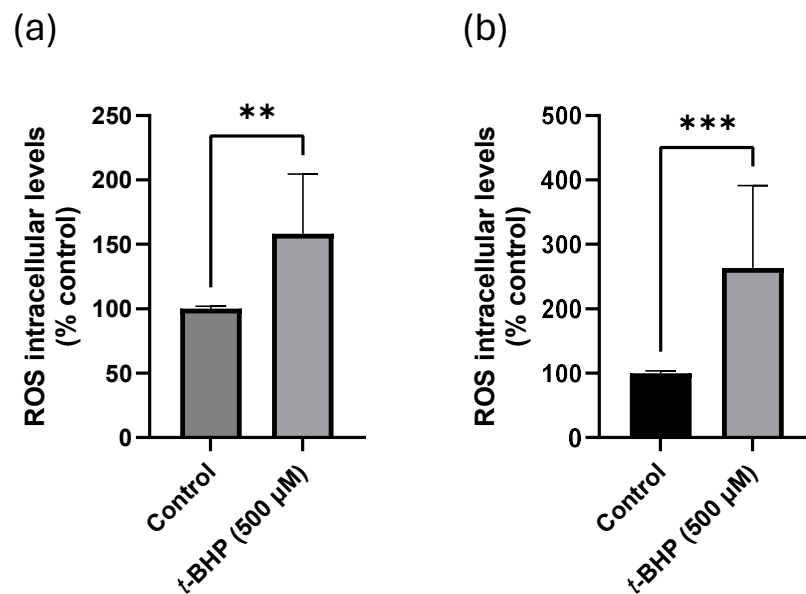

**Figure S3.** Effects of *t*-BHP (500 μM, positive control) on reactive oxygen species (ROS) production in *Candida albicans* ATCC 10231 after (a) 2 and (b) 6 hours of treatment. Results are presented as Mean + SD from 4 independent experiments, performed in duplicate. \*\*  $p < 0.01$ ; \*\*\*  $p < 0.001$ .
